# Supplementary material for: Aging and Alzheimer’s Disease Have Dissociable Effects on Medial Temporal Lobe Connectivity
Source: bioRxiv or medRxiv preprint supplement (doi:10.1101/2023.01.18.23284749), 2023-01-19
Supplement: Supplementary file [file media-1.pdf]

## SUPPLEMENTARY METHODS

### Anatomical Preprocessing in *fMRI*Prep

First, each participant's T1-weighted (T1w) image was corrected for intensity non-uniformity using the N4 algorithm (Tustison et al., 2010). Each T1w image was then skull-stripped with a Nipype (Gorgolewski et al., 2011) implementation of the ANTs brain extraction workflow, using OASIS30ANTs as the target template. Brain-extracted T1w scans were subsequently registered to the brain-extracted 1-mm MNI152Nlin6Asym template using SyN diffeomorphic registration (ANTs 2.2.0; Avants & Gee, 2004; Avants et al., 2008), and brain surfaces were reconstructed using FreeSurfer 6.0.1 (Dale et al., 1999; <http://surfer.nmr.mgh.harvard.edu>). Subject-level CSF, WM, and gray matter (GM) segmentations were performed on brain-extracted T1-weighted scans using FSL *fast* (FSL 5.0.9; Zhang et al., 2001).

### Amyloid PET Analysis

Amyloid PET data were processed with in-house software. First, attenuation-corrected dynamic image frames were motion-corrected using *mcflirt* rigid-body registration (FSL 5.0.9; Jenkinson et al., 2002; Smith et al., 2004). The resulting motion-corrected PET frames were averaged and aligned with participants' T1-weighted structural MRI scans using ANTs rigid-body registration with a mutual information metric (Avants & Gee, 2004; Avants et al., 2008). Each anatomical MRI was segmented into cortical, subcortical, and cerebellar ROIs using a multi-atlas segmentation method (Asman & Landman, 2013; Wang et al., 2013). Mean tracer uptake in the cerebellar gray and white matter was computed and used as a reference to generate a standardized uptake value ratio (SUVR) map for the entire brain. A composite ROI consisting of the middle frontal, anterior cingulate, posterior cingulate, inferior parietal, precuneus, supramarginal, middle temporal, and superior temporal cortical regions was used to compute a global SUVR for amyloid scans (Landau et al., 2013).

## ROI-based Representation of the Extended MTL Network

Extra-MTL ROIs with positive functional connectivity (FC) to the MTL were selected from the 400-region 17-Network Schaefer et al. (2018) parcellation. Cortical regions with connectivity to the MTL were identified in normal agers only [i.e., CU young, middle-aged, and A $\beta$ - older participants]. To test for the presence of FC to the MTL, we performed 4 sets (one per each MTL ROI: left anterior, right anterior, left posterior, right posterior) of one-sample positive-sided  $t$ -tests [FDR-corrected,  $q < 0.05$ ] on Fisher-transformed subject-level Pearson correlation coefficients, representing that segment's FC to each of the 393 non-MTL Schaeffer ROIs. Seven Schaeffer ROIs were excluded because of substantial (>15%) spatial overlap with our anterior or posterior tau-based MTL seeds. To ensure that we did not miss any major cortical regions with FC to the MTL, we also performed seed-to-voxel network identification. Here, one-sample permutation tests (5,000 permutations) for positive connectivity to the bilateral anterior and posterior tau-based MTL ROIs were performed on Fisher-transformed subject-level voxelwise seed-to-voxel connectivity maps (Conn 20.b; Whitfield-Gabrieli & Nieto-Castanon, 2012). The Threshold-Free Cluster Enhancement (TFCE) method with the FDR ( $q < .05$ ) correction for multiple hypothesis testing was used in these voxelwise tests (Benjamini & Hochberg, 1995; Smith & Nichols, 2009). We considered a given Schaeffer ROI as a part of the broader MTL-associated functional system if it was functionally connected to at least one of the MTL ROIs in the ROI-to-ROI network identification or if more than 40% of that ROI's voxels corresponded to a statistically significant cluster in the voxelwise network identification method. In total, we identified 221 Schaeffer ROIs with positive functional connectivity to the MTL. Together with 4 seed regions, these 221 Schaeffer ROIs (225 ROIs in total) were used in all subsequent analyses of the MTL network function (Fig. 2a in the main text).

## SUPPLEMENTARY FIGURES



**Suppl. Figure 1.** Coronal and sagittal planes depict the overall Medial Temporal Lobe (MTL) neurofibrillary tangle burden, derived from a serial histological examination of 15 MTL specimens (for detailed methodology see, Yushkevich et al., 2021). These tau maps were used to create tau-based ROIs for MTL-AT and MTL-PM connectivity analyses.



**Suppl. Figure 2.** This figure is a companion to Fig. 3 from the main text. Instead of canonical Pearson correlations, intra-MTL functional interactions were quantified using partial correlation coefficients, controlling for time courses from all other ASHS-T1 ROIs. Only those connections that represented *direct* intra-MTL functional interactions (see Fig. 2b in the main text) were analyzed. Connectograms depict the effects of (a) age and (b-d) AD progression on *direct* intra-MTL functional connectivity. (e) Matrix-form representation of *direct* intra-MTL connectivity differences between A $\beta$ -positive individuals with preclinical AD and A $\beta$ -negative age-matched controls. (f) Average strength of *direct* connections from the right PRC to other ASHS-T1 ROIs, in A $\beta$ -negative normal agers, A $\beta$ -positive cognitively normal individuals with preclinical AD, and A $\beta$ -positive individuals with symptomatic disease. Abbreviations: PRC = Perirhinal Cortex; ERC = Entorhinal Cortex; PHC = Parahippocampal Cortex; aHP = Anterior Hippocampus; pHP = Posterior Hippocampus; CU = cognitively unimpaired; CI, cognitively impaired.



**Suppl. Figure 3.** The effect of normal aging on inter-module AT-PM connectivity. A single connection, linking the anterior and posterior tau-based MTL ROIs in the left hemisphere with each other, showed connectivity decline in amyloid-negative cognitively unimpaired agers.

## SUPPLEMENTARY TABLES

**Suppl. Table 1.** MTL voxelwise temporal Signal-to-Noise Ratio (tSNR) for raw and preprocessed fMRI datasets, separated by group.

|                               | PRC             |                 | ERC             |                 | PHC             |                 | Anterior HC     |                 | Posterior HC    |                 | Anterior Tau    |                 | Posterior Tau   |                 |
|-------------------------------|-----------------|-----------------|-----------------|-----------------|-----------------|-----------------|-----------------|-----------------|-----------------|-----------------|-----------------|-----------------|-----------------|-----------------|
|                               | Left            | Right           | Left            | Right           | Left            | Right           | Left            | Right           | Left            | Right           | Left            | Right           | Left            | Right           |
| <i>Raw fMRI Data</i>          |                 |                 |                 |                 |                 |                 |                 |                 |                 |                 |                 |                 |                 |                 |
| Young and Middle-Aged         | 13.63<br>(2.62) | 13.44<br>(2.34) | 9.55<br>(2.20)  | 10.15<br>(2.16) | 21.90<br>(2.57) | 21.62<br>(2.31) | 16.97<br>(3.27) | 18.10<br>(3.18) | 21.74<br>(2.33) | 21.82<br>(2.20) | 14.27<br>(2.03) | 15.49<br>(2.06) | 20.83<br>(2.74) | 20.60<br>(2.50) |
| A $\beta$ - CU                | 12.48<br>(2.49) | 11.91<br>(2.42) | 8.92<br>(2.08)  | 9.29<br>(2.57)  | 19.45<br>(3.13) | 18.86<br>(3.09) | 16.14<br>(2.65) | 16.81<br>(2.77) | 20.61<br>(2.22) | 20.35<br>(2.34) | 13.55<br>(2.09) | 14.41<br>(2.28) | 19.52<br>(2.55) | 19.12<br>(2.60) |
| A $\beta$ + CU                | 12.70<br>(2.08) | 12.29<br>(2.34) | 7.92<br>(1.86)  | 8.94<br>(2.44)  | 19.78<br>(2.38) | 19.73<br>(2.52) | 15.69<br>(3.48) | 16.73<br>(3.61) | 20.77<br>(2.19) | 20.90<br>(2.18) | 13.14<br>(1.91) | 14.08<br>(2.51) | 19.83<br>(2.25) | 19.70<br>(2.01) |
| A $\beta$ + CI                | 12.00<br>(2.10) | 11.56<br>(2.03) | 7.95<br>(1.54)  | 8.90<br>(2.21)  | 19.13<br>(2.08) | 18.61<br>(2.07) | 15.33<br>(2.57) | 15.99<br>(3.12) | 20.47<br>(1.90) | 20.36<br>(1.96) | 13.63<br>(1.69) | 14.43<br>(2.07) | 19.44<br>(2.10) | 19.33<br>(2.04) |
| <i>Preprocessed fMRI Data</i> |                 |                 |                 |                 |                 |                 |                 |                 |                 |                 |                 |                 |                 |                 |
| Young and Middle-Aged         | 263.3<br>(51.5) | 260.5<br>(51.3) | 194.9<br>(40.1) | 202.4<br>(34.5) | 351.4<br>(47.3) | 344.0<br>(45.7) | 303.5<br>(58.6) | 317.4<br>(55.2) | 368.6<br>(41.4) | 373.2<br>(39.8) | 262.9<br>(46.8) | 280.2<br>(44.9) | 364.2<br>(51.0) | 364.5<br>(44.1) |
| A $\beta$ - CU                | 247.1<br>(47.3) | 236.6<br>(48.9) | 192.5<br>(32.4) | 198.7<br>(35.8) | 326.7<br>(38.9) | 319.6<br>(46.8) | 300.0<br>(42.2) | 309.0<br>(42.6) | 362.2<br>(39.2) | 357.2<br>(38.8) | 257.4<br>(38.0) | 268.8<br>(38.9) | 354.2<br>(45.5) | 347.3<br>(47.0) |
| A $\beta$ + CU                | 244.8<br>(44.3) | 240.0<br>(51.4) | 176.9<br>(33.0) | 190.5<br>(39.6) | 322.1<br>(33.4) | 321.5<br>(30.8) | 296.8<br>(48.1) | 309.7<br>(53.2) | 362.3<br>(40.6) | 365.5<br>(32.7) | 253.4<br>(39.6) | 264.8<br>(49.2) | 354.8<br>(40.4) | 352.7<br>(34.6) |
| A $\beta$ + CI                | 243.0<br>(43.4) | 232.8<br>(42.4) | 193.8<br>(28.1) | 198.4<br>(40.0) | 337.2<br>(42.4) | 326.9<br>(35.4) | 317.7<br>(47.7) | 320.9<br>(52.3) | 381.2<br>(46.9) | 384.7<br>(40.7) | 272.9<br>(38.0) | 280.2<br>(41.9) | 374.8<br>(51.7) | 373.3<br>(46.6) |

**Suppl. Table 2.** Displacement (FD) for raw and filtered realignment parameters, separated by group.

|                       | Young and Middle-Aged<br>(mm) | A $\beta$ - CU<br>(mm) | A $\beta$ + CU<br>(mm) | A $\beta$ + CI<br>(mm) |
|-----------------------|-------------------------------|------------------------|------------------------|------------------------|
| Raw Mean FD (SD)      | 0.1588 (0.0700)               | 0.2627 (0.1236)        | 0.2303 (0.0814)        | 0.2158 (0.0974)        |
| Raw Max FD (SD)       | 0.6209 (0.5888)               | 1.1046 (1.0069)        | 1.0697 (0.7293)        | 1.2868 (1.0637)        |
| Filtered Mean FD (SD) | 0.0213 (0.0118)               | 0.0403 (0.0193)        | 0.0420 (0.0173)        | 0.0401 (0.0263)        |
| Filtered Max FD (SD)  | 0.1698 (0.1354)               | 0.2273 (0.1900)        | 0.2633 (0.1737)        | 0.2915 (0.2155)        |

## SUPPLEMENTARY REFERENCES

- Asman, A. J., & Landman, B. A. (2013). Non-local statistical label fusion for multi-atlas segmentation. *Medical Image Analysis*, *17*(2), 194-208.  
<https://doi.org/https://doi.org/10.1016/j.media.2012.10.002>
- Avants, B., & Gee, J. C. (2004). Geodesic estimation for large deformation anatomical shape averaging and interpolation. *Neuroimage*, *23 Suppl 1*, S139-150.  
<https://doi.org/10.1016/j.neuroimage.2004.07.010>
- Avants, B. B., Epstein, C. L., Grossman, M., & Gee, J. C. (2008). Symmetric diffeomorphic image registration with cross-correlation: evaluating automated labeling of elderly and neurodegenerative brain. *Med Image Anal*, *12*(1), 26-41.  
<https://doi.org/10.1016/j.media.2007.06.004>
- Benjamini, Y., & Hochberg, Y. (1995). Controlling the False Discovery Rate: A Practical and Powerful Approach to Multiple Testing. *Journal of the Royal Statistical Society. Series B (Methodological)*, *57*(1), 289-300.  
<http://www.jstor.org.proxy.library.upenn.edu/stable/2346101>
- Dale, A. M., Fischl, B., & Sereno, M. I. (1999). Cortical surface-based analysis. I. Segmentation and surface reconstruction. *Neuroimage*, *9*(2), 179-194.  
<https://doi.org/10.1006/nimg.1998.0395>
- Gorgolewski, K., Burns, C. D., Madison, C., Clark, D., Halchenko, Y. O., Waskom, M. L., & Ghosh, S. S. (2011). Nipype: a flexible, lightweight and extensible neuroimaging data processing framework in python. *Front Neuroinform*, *5*, 13.  
<https://doi.org/10.3389/fninf.2011.00013>
- Jenkinson, M., Bannister, P., Brady, M., & Smith, S. (2002). Improved optimization for the robust and accurate linear registration and motion correction of brain images. *Neuroimage*, *17*(2), 825-841. [https://doi.org/10.1016/s1053-8119\(02\)91132-8](https://doi.org/10.1016/s1053-8119(02)91132-8)
- Landau, S. M., Breault, C., Joshi, A. D., Pontecorvo, M., Mathis, C. A., Jagust, W. J., Mintun, M. A., & Alzheimer's Disease Neuroimaging, I. (2013). Amyloid-beta imaging with Pittsburgh compound B and florbetapir: comparing radiotracers and quantification methods. *J Nucl Med*, *54*(1), 70-77. <https://doi.org/10.2967/jnumed.112.109009>
- Schaefer, A., Kong, R., Gordon, E. M., Laumann, T. O., Zuo, X. N., Holmes, A. J., Eickhoff, S. B., & Yeo, B. T. T. (2018). Local-Global Parcellation of the Human Cerebral Cortex from Intrinsic Functional Connectivity MRI. *Cereb Cortex*, *28*(9), 3095-3114.  
<https://doi.org/10.1093/cercor/bhx179>

- Smith, S. M., Jenkinson, M., Woolrich, M. W., Beckmann, C. F., Behrens, T. E., Johansen-Berg, H., Bannister, P. R., De Luca, M., Drobnjak, I., Flitney, D. E., Niazy, R. K., Saunders, J., Vickers, J., Zhang, Y., De Stefano, N., Brady, J. M., & Matthews, P. M. (2004). Advances in functional and structural MR image analysis and implementation as FSL. *Neuroimage*, *23 Suppl 1*, S208-219. <https://doi.org/10.1016/j.neuroimage.2004.07.051>
- Smith, S. M., & Nichols, T. E. (2009). Threshold-free cluster enhancement: addressing problems of smoothing, threshold dependence and localisation in cluster inference. *Neuroimage*, *44*(1), 83-98. <https://doi.org/10.1016/j.neuroimage.2008.03.061>
- Tustison, N. J., Avants, B. B., Cook, P. A., Zheng, Y., Egan, A., Yushkevich, P. A., & Gee, J. C. (2010). N4ITK: improved N3 bias correction. *IEEE Trans Med Imaging*, *29*(6), 1310-1320. <https://doi.org/10.1109/TMI.2010.2046908>
- Wang, H., Suh, J. W., Das, S. R., Pluta, J. B., Craige, C., & Yushkevich, P. A. (2013). Multi-Atlas Segmentation with Joint Label Fusion. *IEEE Trans Pattern Anal Mach Intell*, *35*(3), 611-623. <https://doi.org/10.1109/TPAMI.2012.143>
- Whitfield-Gabrieli, S., & Nieto-Castanon, A. (2012). Conn: a functional connectivity toolbox for correlated and anticorrelated brain networks. *Brain Connect*, *2*(3), 125-141. <https://doi.org/10.1089/brain.2012.0073>
- Zhang, Y., Brady, M., & Smith, S. (2001). Segmentation of brain MR images through a hidden Markov random field model and the expectation-maximization algorithm. *IEEE Trans Med Imaging*, *20*(1), 45-57. <https://doi.org/10.1109/42.906424>
